# Supplementary material
Source: publisher figshare collection journal article supplement (https://acs.figshare.com/ndownloader/files/15221705)
Supplement: Supplementary file 1 [file 15221705]

Supplemental Information:

# Charge Density Wave State Suppresses Ferromagnetic Ordering in VSe<sub>2</sub> Monolayers

Paula Coelho,<sup>1,#</sup> Kien Nguyen Cong,<sup>1,#</sup> Manuel Bonilla,<sup>1</sup> Sadhu Kolekar,<sup>1</sup> Manh-Huong Phan,<sup>1</sup> José Avila,<sup>2,3</sup>  
Maria C. Asensio,<sup>2,3,4</sup> Ivan I. Oleynik,<sup>1</sup> Matthias Batzill<sup>1,\*</sup>

<sup>1</sup> Department of Physics, University of South Florida, Tampa, FL 33620, USA

<sup>2</sup> Synchrotron SOLEIL, L'Orme des Merisiers, Saint Aubin-BP 48, Gif sur Yvette Cedex 91192, France

<sup>3</sup> Université Paris-Saclay, L'Orme des Merisiers, Saint Aubin-BP 48, Gif sur Yvette Cedex 91192, France

<sup>4</sup> Madrid Institute of Materials Science (ICMM), Spanish Scientific Research Council (CSIC), Cantoblanco, E-28049 Madrid, Spain

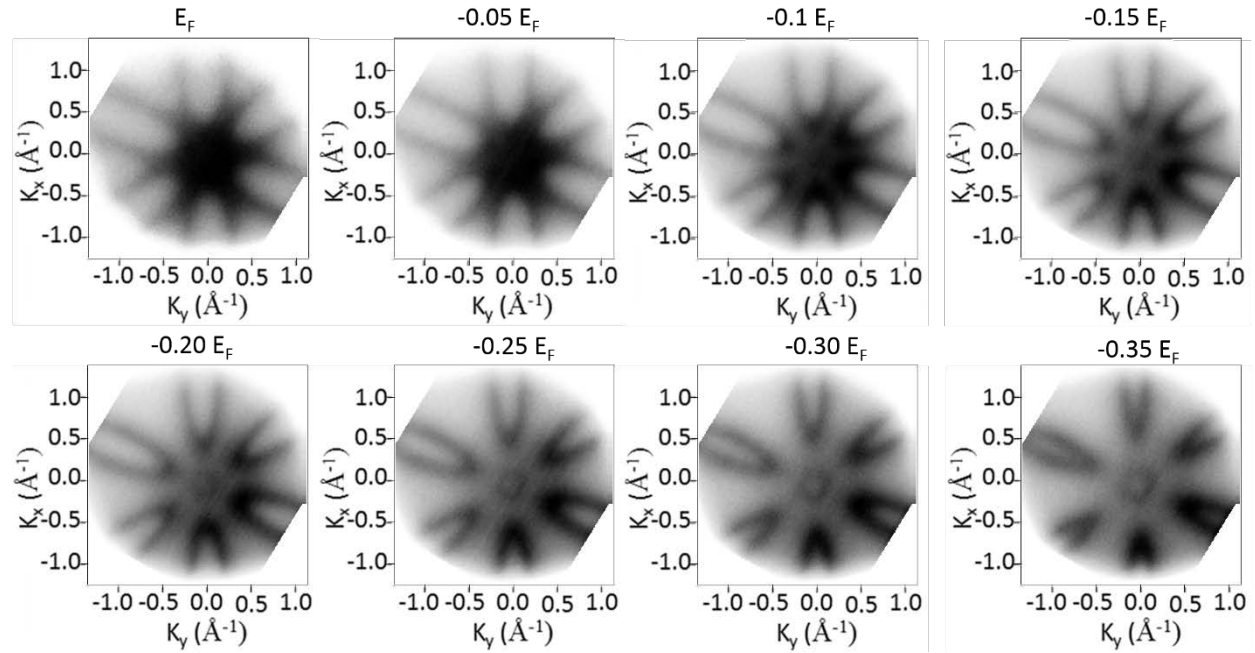

**Fig. S1: Constant energy surfaces at different binding energies relative to the Fermi-level.**

| Commensurate nesting vectors | Real vector length (in units of a) | Rotation angle | Reciprocal vector length (in units of $a^*$ ) | Reciprocal vector length (in $\text{\AA}^{-1}$ ) | Experimental separation of the Fermi-sheets (in $\text{\AA}^{-1}$ ) | Mismatch |
|------------------------------|------------------------------------|----------------|-----------------------------------------------|--------------------------------------------------|---------------------------------------------------------------------|----------|
| 0                            | $2\sqrt{3}$                        | $30^\circ$     | 0.29                                          | 0.62                                             | 0.56                                                                | -10%     |
| 1                            | $\sqrt{19}$                        | $23.4^\circ$   | 0.23                                          | 0.5                                              | 0.56                                                                | +11%     |
| 2                            | $\sqrt{28}$                        | $19.1^\circ$   | 0.19                                          | 0.41                                             | 0.57                                                                | +28%     |
| 3                            | $\sqrt{13}$                        | $13.9^\circ$   | 0.28                                          | 0.6                                              | 0.58                                                                | -3%      |
| 4                            | $\sqrt{21}$                        | $10.9^\circ$   | 0.22                                          | 0.47                                             | 0.59                                                                | +20%     |
| 5                            | $\sqrt{31}$                        | $8.9^\circ$    | 0.18                                          | 0.39                                             | 0.60                                                                | +35%     |
| 6                            | 4                                  | $0^\circ$      | 0.25                                          | 0.54                                             | 0.65                                                                | +17%     |

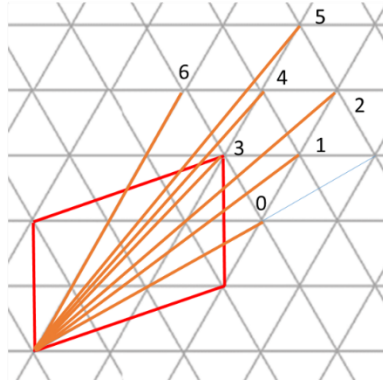

**Fig. S2: Comparison of how well possible CDW vectors fulfill the Fermi-surface nesting condition. Different real space commensurate real space vectors are shown and their labels correspond to the values in column 1 of the table. Column 2 shows their real space length and column 3 their rotation angle. Column 4 and 5 show the reciprocal vector length in units of reciprocal lattice constant and  $\text{\AA}^{-1}$ , respectively. This length may be compared to the measured separation of the Fermi-sheets along the direction of the reciprocal vectors. The last column of the table shows the discrepancy of the reciprocal vector length with the separation of the Fermi-sheets. It can be seen that the reciprocal vector of the real space  $\sqrt{13}19.1$  vector matches the Fermi-nesting condition best. This vector corresponds to the diagonal of the  $\sqrt{3}30 \times \sqrt{7}19.1$  primitive CDW unit cell. Thus this analysis would conclude that the observed CDW unit cell is the one with the best nesting condition of any commensurate CDW vector.**
